# Supplementary material
Source: Springer Nature journal article supplement (https://www.springermedizin.de/resource/supplementary/12875_2012_725_MOESM1_ESM.pdf/9435226)

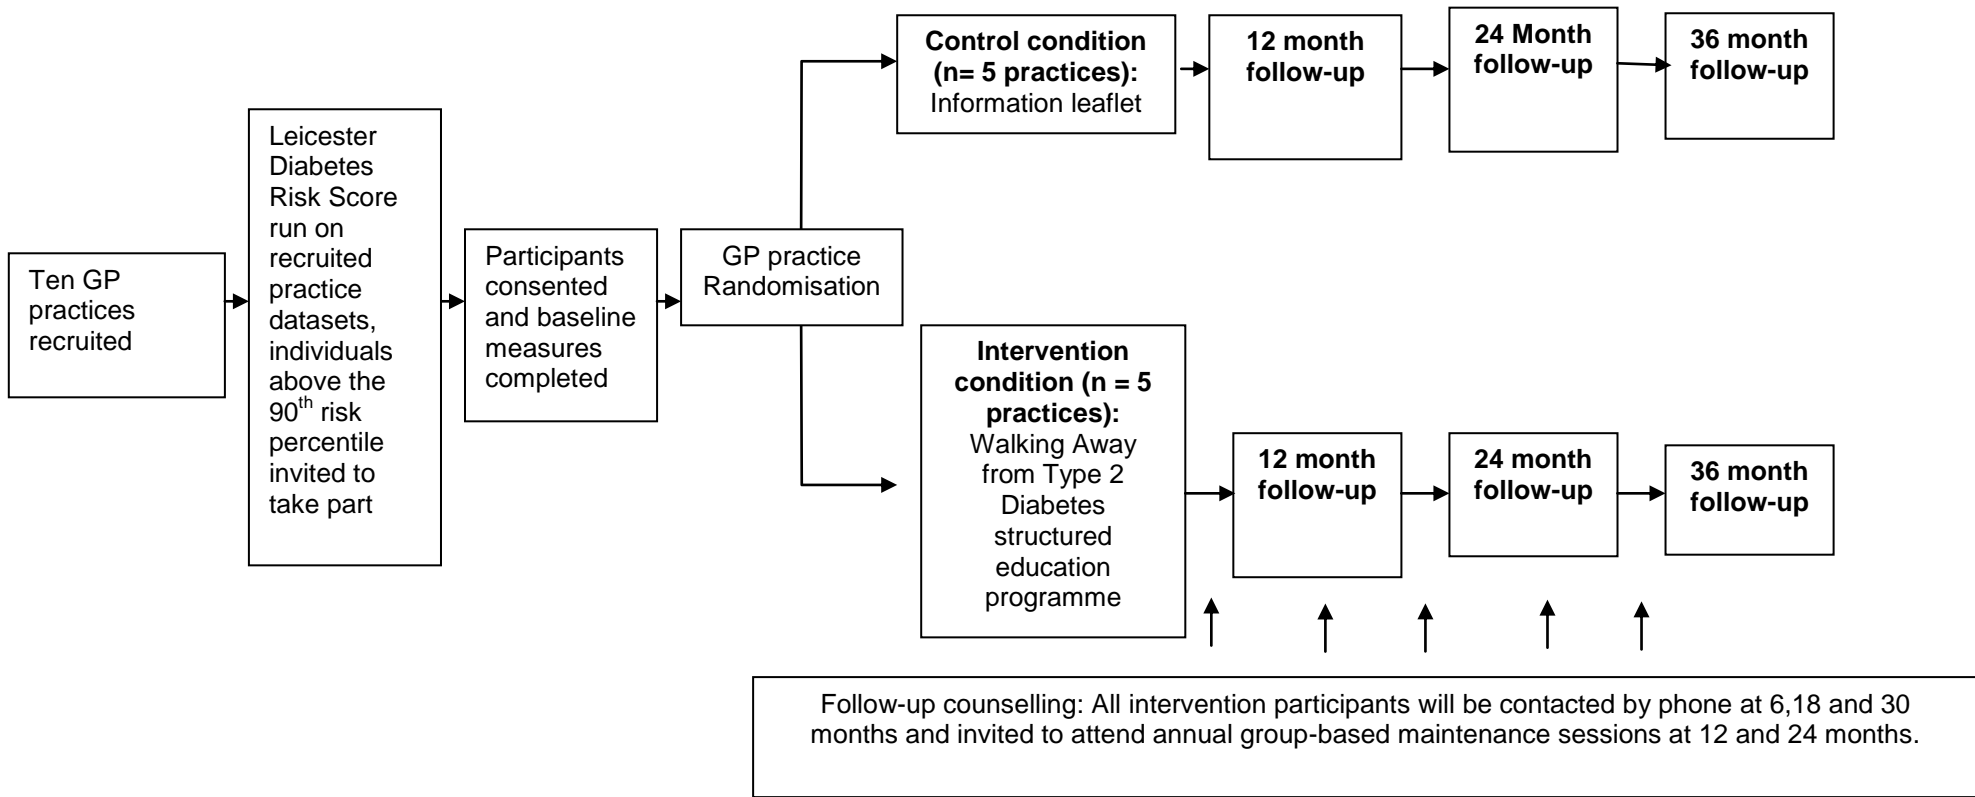

Supplement: MOESM1 [file 9435226]
